# Supplementary material for: Identification of resistance loci in Chinese and Canadian canola/rapeseed varieties against Leptosphaeria maculans based on genome-wide association studies
Source: PubMed Central journal article supplement (PMC7372758; doi:10.1186/s12864-020-06893-4), 2020-07-21

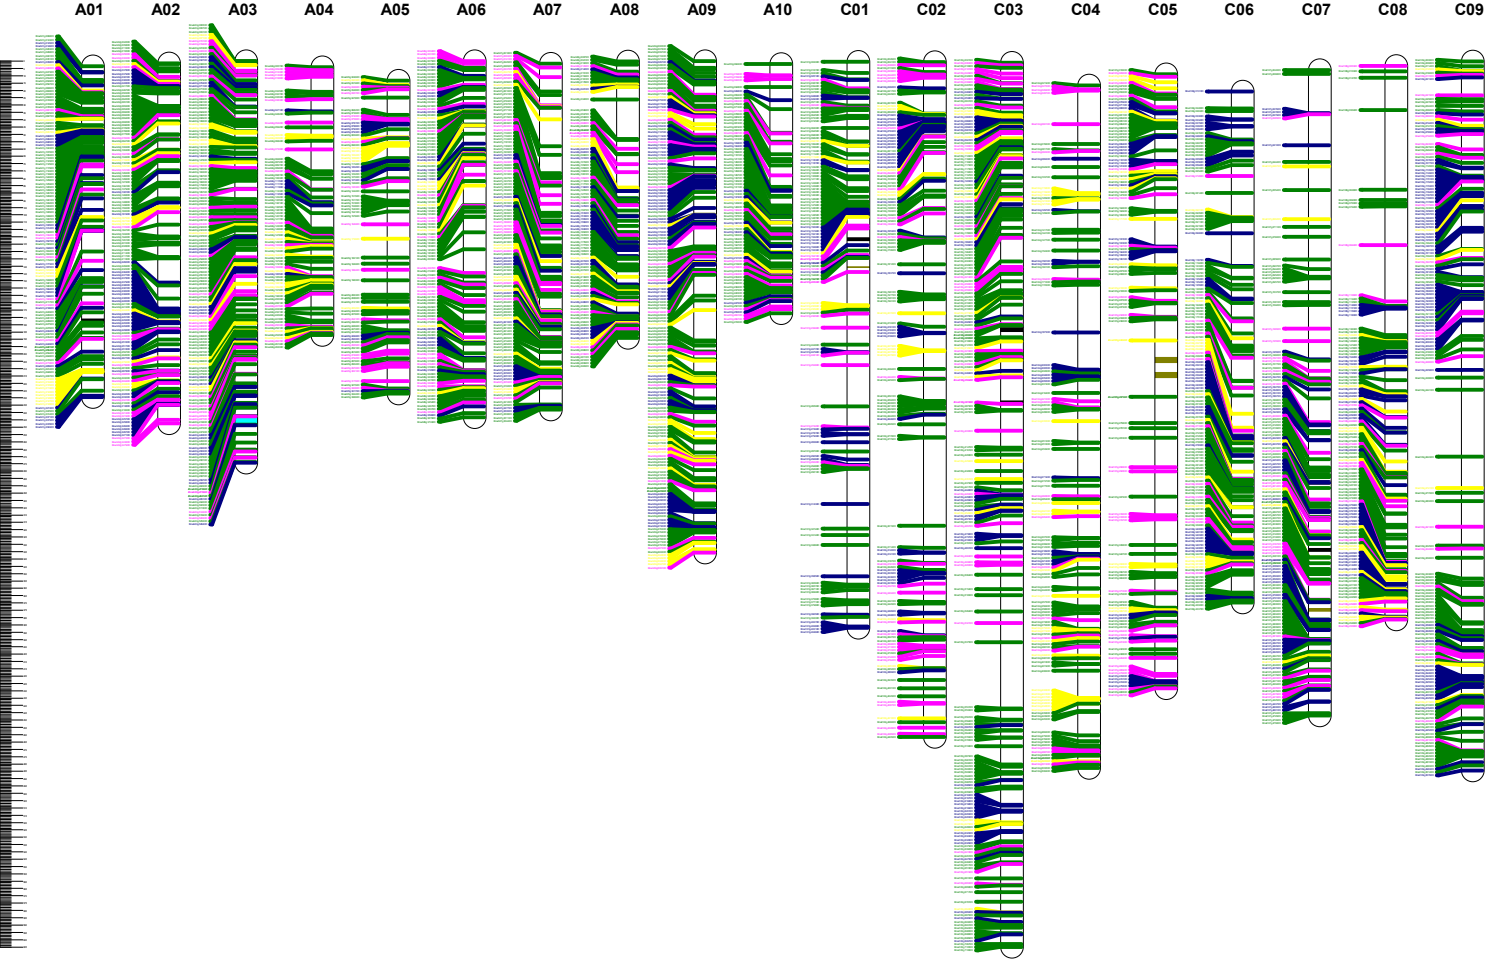

Supplement: 12864_2020_6893_MOESM1_ESM.pdf [file 12864_2020_6893_MOESM1_ESM.pdf]
